# Supplementary material for: Identifying the Active Sites of Heteroatom Graphene as a Conductive Membrane for the Electrochemical Filtration of Organic Contaminants
Source: MDPI journal article supplement (doi:10.3390/ijms232314967), 2022-11-29
Supplement: s1 [file s1]

# **Identifying the active sites of heteroatom graphene as a conductive membrane for the electrochemical filtration of organic contaminants**

Meilan Pan, Junjian Li, Bingjun Pan\*

College of Environment, Zhejiang University of Technology, Hangzhou, Zhejiang 310014, China

\* To whom correspondence should be addressed (BJ Pan); E-mail: [bjpan@zjut.edu.cn](mailto:bjpan@zjut.edu.cn)  
Tel: +86 571 8881 3767  
Fax: +86 571 8881 3767

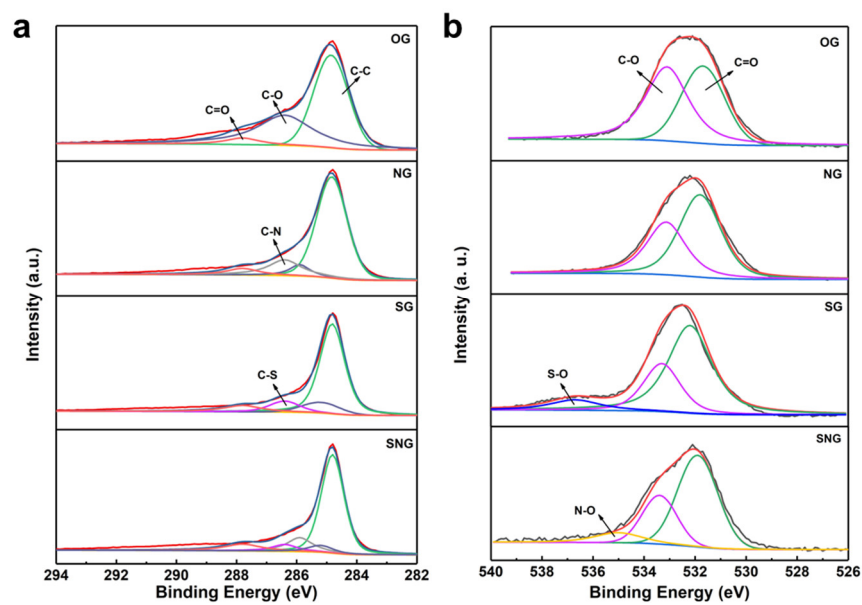

**Figure S1.** XPS spectra of C 1s (a) and O 1s (b).

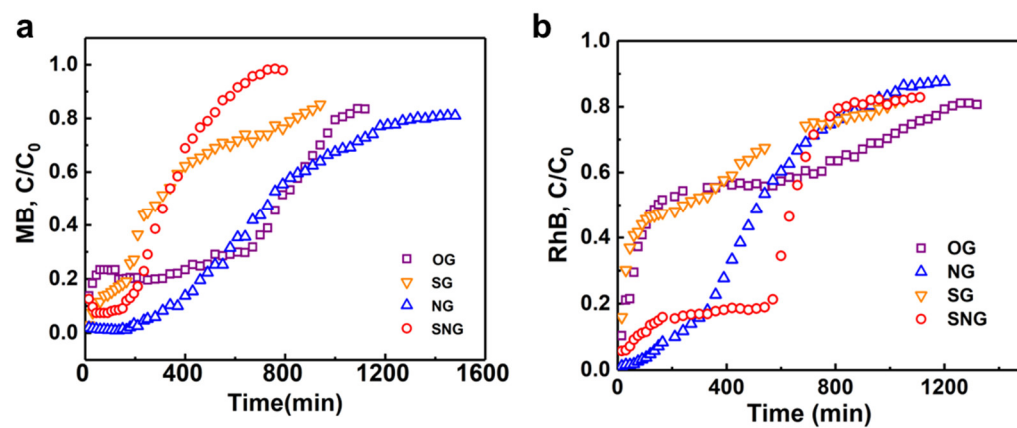

**Figure S2.** The adsorption curves of OG, NG, SG, and SNG for MB (a) and RhB (b).

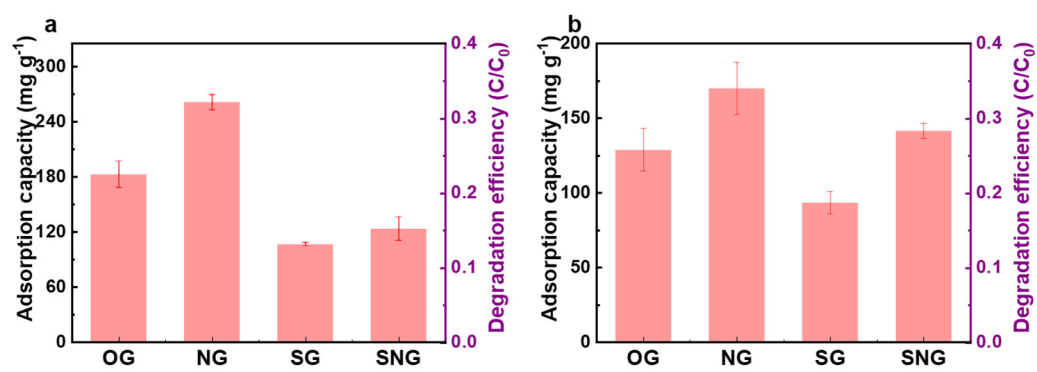

**Figure S3.** The adsorption capacity of OG, NG, SG, and SNG for MB (a) and RhB (b).

**Table S1.** The oxidation peak potentials ( $E_{pa}$ ), reduction peak potentials ( $E_{pc}$ ), and peak-to-peak potentials ( $\Delta E_p$ ) in the  $\{[\text{Fe}(\text{CN})_6]^{4-/3-}\}$  and  $\text{Fe}^{2+/3+}(\text{H}_2\text{O})$  solution

| Samples | $[\text{Fe}(\text{CN})_6]^{3-/4-}$ |              |                   | $\text{Fe}^{2+/3+}(\text{H}_2\text{O})$ |              |                   |
|---------|------------------------------------|--------------|-------------------|-----------------------------------------|--------------|-------------------|
|         | $E_{pa}$ , V                       | $E_{pc}$ , V | $\Delta E_p$ , mV | $E_{pa}$ , V                            | $E_{pc}$ , V | $\Delta E_p$ , mV |
| NG      | 0.132                              | 0.271        | 139               | 0.226                                   | 0.578        | 352               |
| SG      | 0.138                              | 0.265        | 127               | 0.362                                   | 0.470        | 108               |
| SNG     | 0.123                              | 0.289        | 166               | 0.169                                   | 0.676        | 507               |

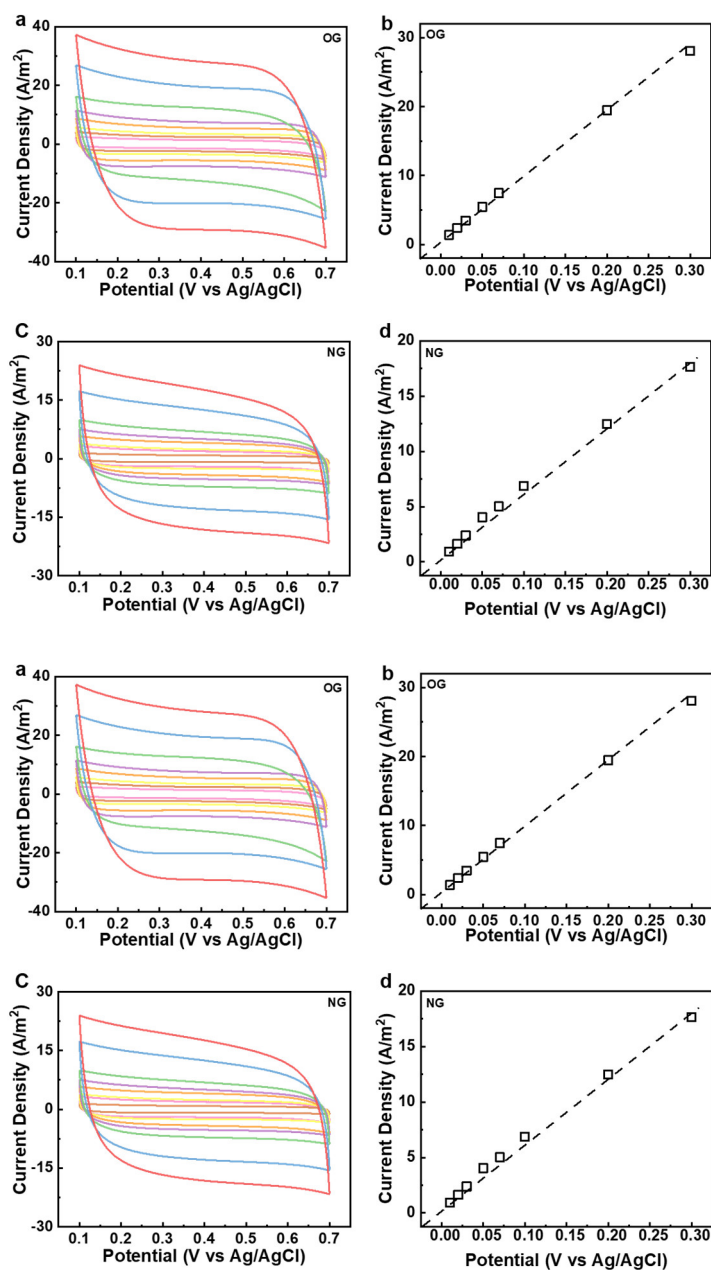

**Figure S4.** (a, c, e, g) CVs of OG, NG, SG and SNG collected in 0.1 M PBS solution and at different scan rates; (b, d, f, h) the corresponding current densities at 0.55 V (vs Ag/AgCl) as a function of scan rate.

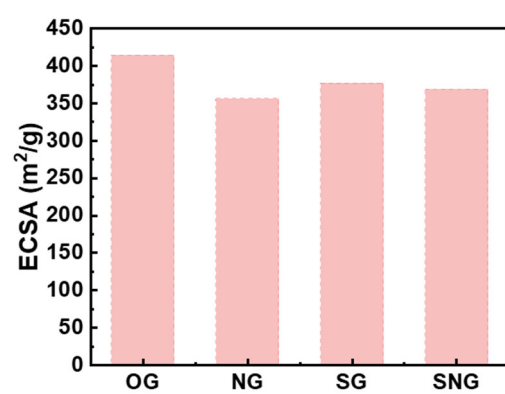

**Figure S5.** The ECSA of OG, NG, SG, and SNG.
